# Supplementary material for: Defining a standardized methodology for the determination of the antioxidant capacity: case study of Pistacia atlantica leaves
Source: Royal Society of Chemistry journal article supplement (doi:10.1039/c9an01643k), 2019-11-26
Supplement: c9an01643k6.pdf [file c9an01643k6.pdf]

**Fig. S1** Compounds of importance when predicting  $TAC_{Mch}$  of *P. atlantica* extracts shown on a (a) an overlay chromatogram, as evaluated using (b) regression coefficients of PLS after column centering, (c) regression coefficients of PLS after normalization and column centering, and (d) regression coefficients of PLS after standard normal variate and column centering.

**Fig. S2** Compounds of importance when predicting  $TAC_{ROO}$  of *P. atlantica* extracts shown on a (a) an overlay chromatogram, as evaluated using (b) regression coefficients of PLS after column centering, (c) regression coefficients of PLS after normalization and column centering, and (d) regression coefficients of PLS after standard normal variate and column centering.

**Fig. S3** Compounds of importance when predicting  $TAC_{OH}$  of *P. atlantica* extracts shown on a (a) an overlay chromatogram, as evaluated using (b) regression coefficients of PLS after column centering, (c) regression coefficients of PLS after normalization and column centering, and (d) regression coefficients of PLS after standard normal variate and column centering.

**Fig. S4** Compounds of importance when predicting  $TAC_{NO}$  of *P. atlantica* extracts shown on a (a) an overlay chromatogram, as evaluated using (b) regression coefficients of PLS after column centering, (c) regression coefficients of PLS after normalization and column centering, and (d) regression coefficients of PLS after standard normal variate and column centering.

**Fig. S5** Compounds of importance when predicting  $TACO_2^-$  of *P. atlantica* extracts shown on a (a) an overlay chromatogram, as evaluated using (b) regression coefficients of PLS after column centering, (c) regression coefficients of PLS after normalization and column centering, and (d) regression coefficients of PLS after standard normal variate and column centering.
