# Supplementary figures and images for: Defining a standardized methodology for the determination of the antioxidant capacity: case study of Pistacia atlantica leaves
Source: Royal Society of Chemistry journal article supplement (doi:10.1039/c9an01643k), 2019-11-26

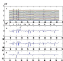

Supplement: c9an01643k3.pdf [file c9an01643k3.pdf]

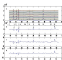

Supplement: c9an01643k4.pdf [file c9an01643k4.pdf]
